# Supplementary material for: Enhanced air-stability of Sn-based hybrid perovskites induced by dimethylammonium (DMA): synthesis, characterization, aging and hydrogen photogeneration of the MA1−xDMAxSnBr3system
Source: Royal Society of Chemistry journal article supplement (doi:10.1039/c9tc01743g), 2019-01-01
Supplement: c9tc01743g1.pdf [file c9tc01743g1.pdf]

## ELECTRONIC SUPPLEMENTARY INFORMATION

### Enhanced Air-Stability of Sn-based Hybrid Perovskites Induced by Dimethylammonium (DMA): Synthesis, Characterization, Aging and Hydrogen Photogeneration of the $\text{MA}_{1-x}\text{DMA}_x\text{SnBr}_3$ System

Ambra Pisanu,<sup>a</sup> Andrea Speltini,<sup>b</sup> Paolo Quadrelli,<sup>a</sup> Giovanni Drera,<sup>c</sup> Luigi Sangaletti,<sup>c</sup> Lorenzo Malavasi<sup>a,\*</sup>

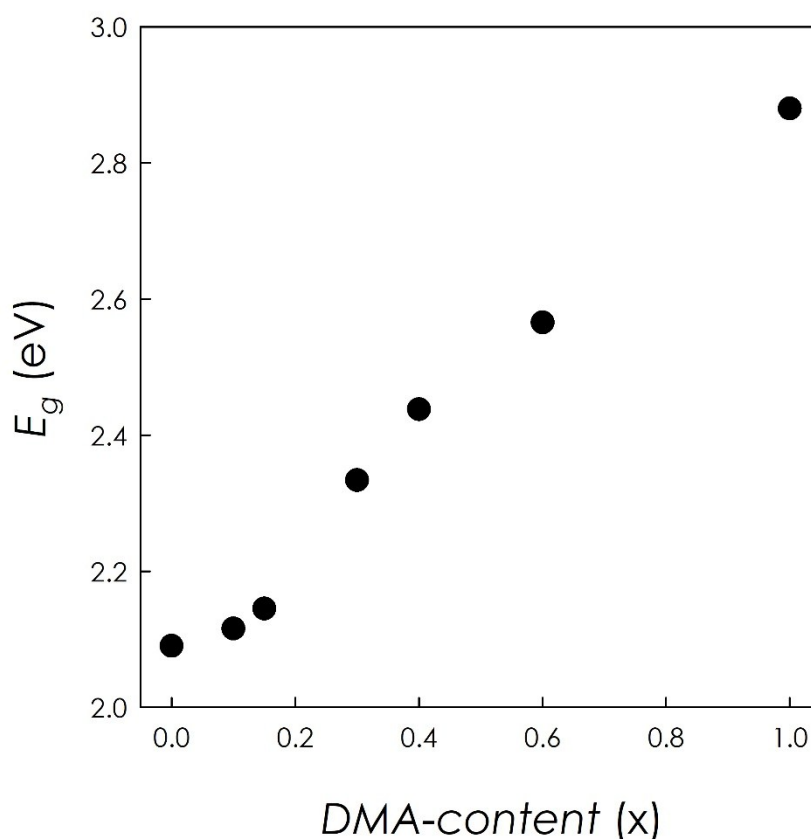

**Figure S1:** Band-gap as a function of  $x$  for the  $\text{MA}_{1-x}\text{DMA}_x\text{SnBr}_3$  samples reported in the main text. Band-gap have been determined from the Tauc plots reported in Figure 4b.

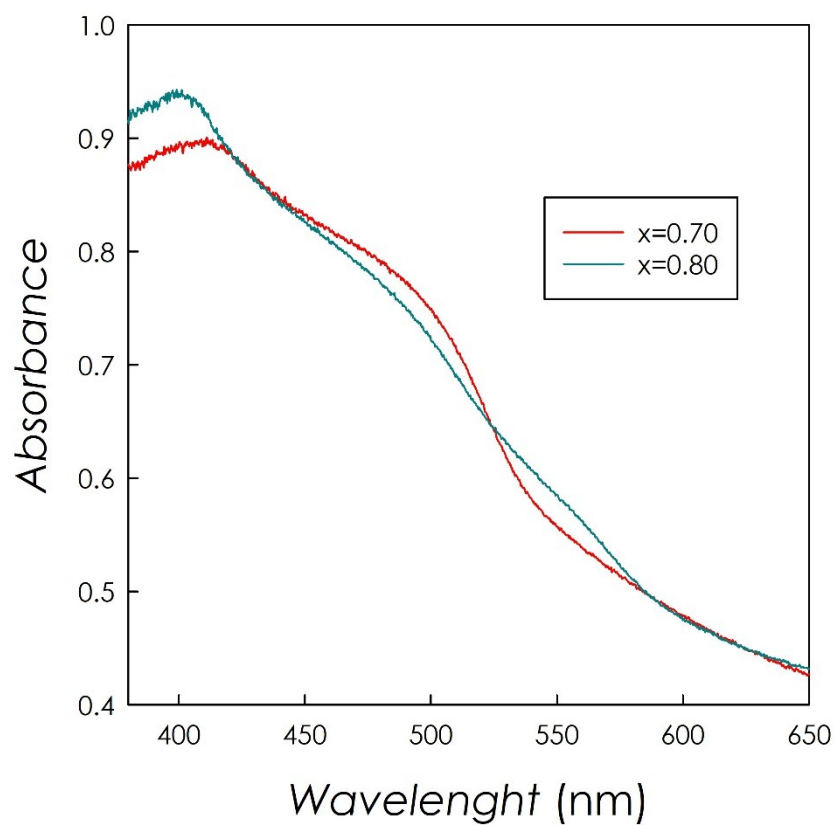

**Figure S2:** Absorption spectra of the  $\text{MA}_{1-x}\text{DMA}_x\text{SnBr}_3$  samples for  $x=0.70$  and  $x=0.80$ .

| <i>Sample</i>                        | <i>a</i> (Å) | <i>b</i> (Å) | <i>c</i> (Å) |
|--------------------------------------|--------------|--------------|--------------|
| <b><i>x=0</i></b><br><b>As-prep</b>  | 5.9129(5)    | 5.9129(5)    | 5.9129(5)    |
| <b><i>x=0</i></b><br><b>1- day</b>   | 5.9127(5)    | 5.9198(5)    | 5.9198(5)    |
| <b><i>x=0</i></b><br><b>6 - days</b> | 5.9112(5)    | 5.9210(6)    | 5.9210(6)    |
| <b><i>x=1</i></b><br><b>As-prep</b>  | 12.3216(4)   | 12.1812(3)   | 12.3265(3)   |
| <b><i>x=1</i></b><br><b>1- day</b>   | 12.3145(4)   | 12.1791(3)   | 12.3042(3)   |
| <b><i>x=1</i></b><br><b>6 - days</b> | 12.2895(6)   | 12.1737(5)   | 12.2917(5)   |

**Table S1:** Lattice parameters of  $\text{MASnBr}_3$  and  $\text{DMASnBr}_3$  aged sample at 1- and 6-days aging.

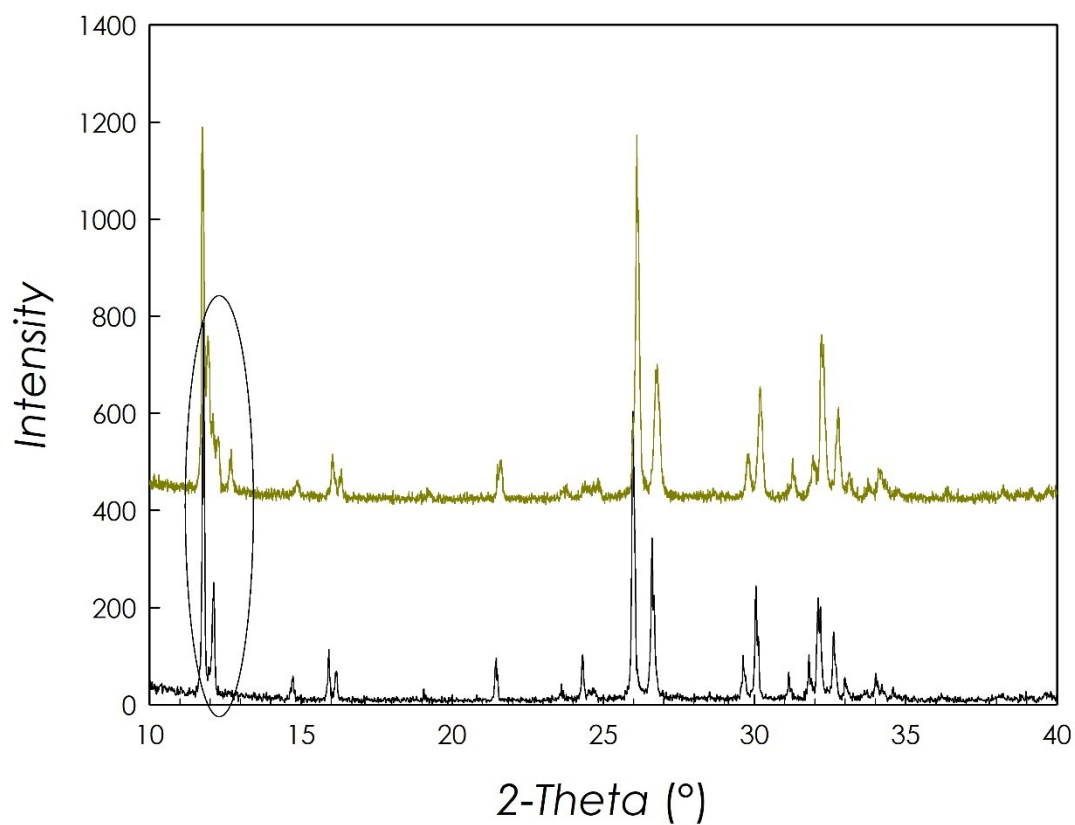

**Figure S3:** X-ray diffraction pattern of black (bottom) and yellow (top) phases of  $\text{DMASnI}_3$ . The intensity in the pattern of yellow phase has been shifted by 400 for ease of visualization.

| SAMPLE                                                           | $\text{H}_2$ Production ( $\mu\text{mol/g/h}$ ) |
|------------------------------------------------------------------|-------------------------------------------------|
| $\text{DMASnBr}_3 + \text{DI}$                                   | 6                                               |
| $\text{DMASnBr}_3 + \text{DI} + \text{TEOA } 10\% +$<br>1 wt% Pt | 11                                              |
| DI                                                               | 0.0                                             |
| DI+TEOA                                                          | 0.0                                             |

**Table S2:** Results of hydrogen production
